# Supplementary material
Source: PubMed Central journal article supplement (PMC3617951)
Supplement: supp_M033811_jlr.M033811-1.pdf [file supp_M033811_jlr.M033811-1.pdf]

### Supplemental Figures

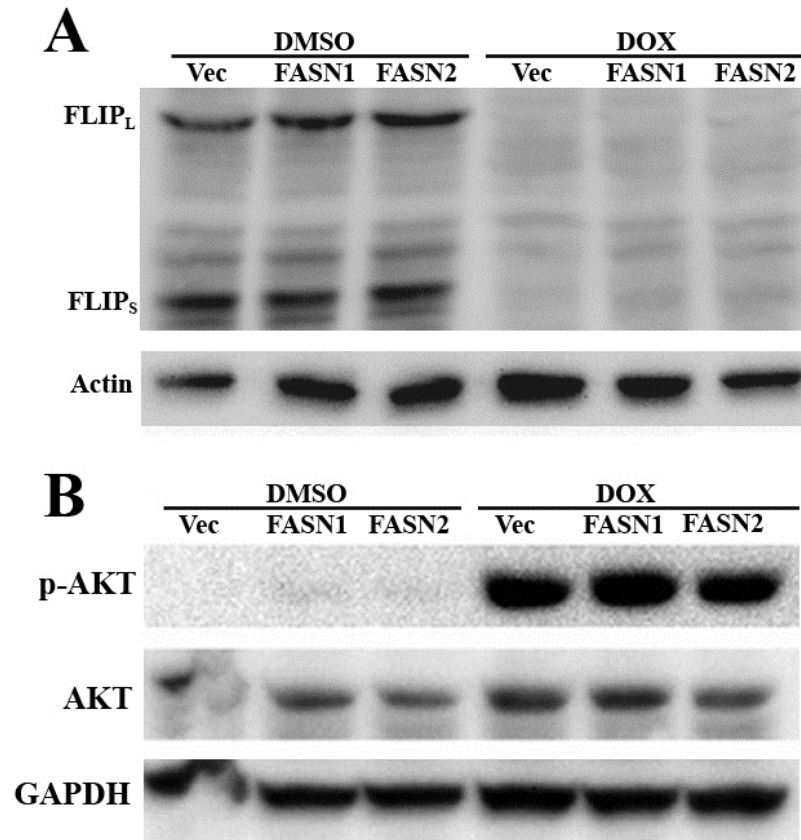

**Figure S1. Effect of FASN on c-FILP and AKT.** Stable MCF7 cells with FASN over-expression (FASN1 and FASN2) and vector-transfected control (Vec) cells were treated with 1  $\mu$ M doxorubicin (DOX) or DMSO vehicle control for 24 hrs followed by analysis of c-FLIP<sub>L</sub>, c-FLIP<sub>S</sub>, total AKT, and activated AKT (p-AKT) using Western blot. Actin and GAPDH were used as loading controls.

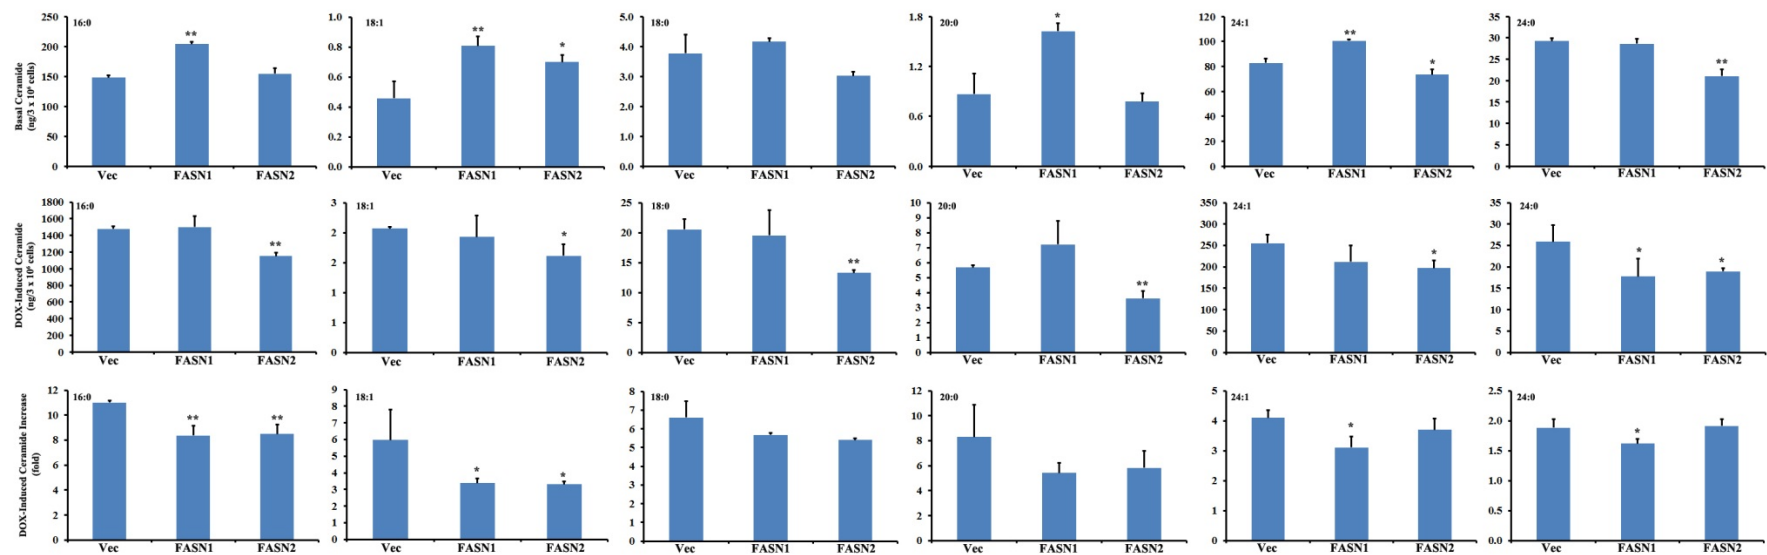

**Figure S2. Effect of FASN over-expression on basal and doxorubicin-induced individual ceramide generation.** A. Basal level of ceramide C16:0, C18:0, C18:1, C20:0, C24:0, and C24:1. Basal level of individual ceramide in stable MCF7 cells with FASN over-expression (FASN1 and FASN2) and vector-transfected control (Vec) cells were determined using mass spectrometry as described in Materials and Methods. B and C. Doxorubicin-induced increase of ceramide ceramide C16:0, C18:0, C18:1, C20:0, C24:0, and C24:1. Individual ceramides were determined in stable MCF7 cells with FASN over-expression (FASN1 and FASN2) and vector-transfected control cells (Vec) following treatment with 1  $\mu$ M doxorubicin for 48 hrs. DOX-induced ceramide increase (fold) =ceramide in cells treated with doxorubicin/ceramide in cells treated without doxorubicin. (\* p<0.05; \*\*p<0.01)

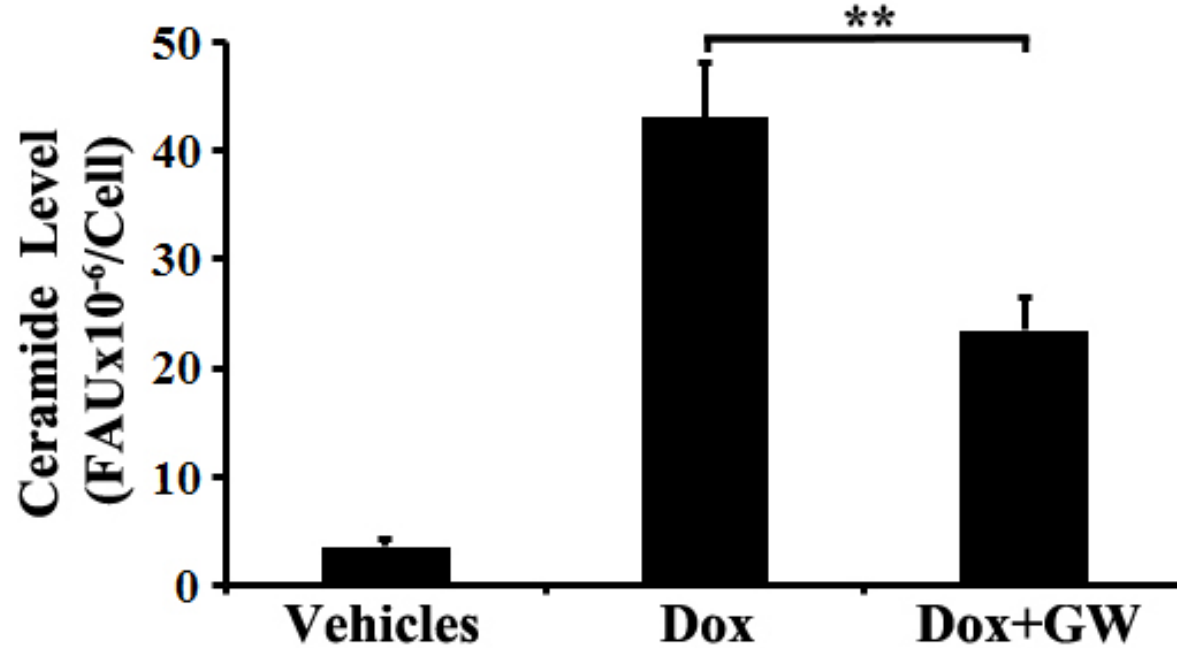

**Figure S3. Inhibition of doxorubicin-induced ceramide production by GW4869.** MCF7 cells were treated with vehicle (5% methane sulfonic acid) or 10  $\mu$ M GW4869 (GW) for 30 min, followed by addition and incubation with 1  $\mu$ M doxorubicin (Dox) or DMSO vehicle for 24 hrs. Cells were then harvested for determination of ceramide level using immunofluorescence staining as described in Materials and Methods. (\*\* $p < 0.01$ ; FAU=fluorescence arbitrary units).

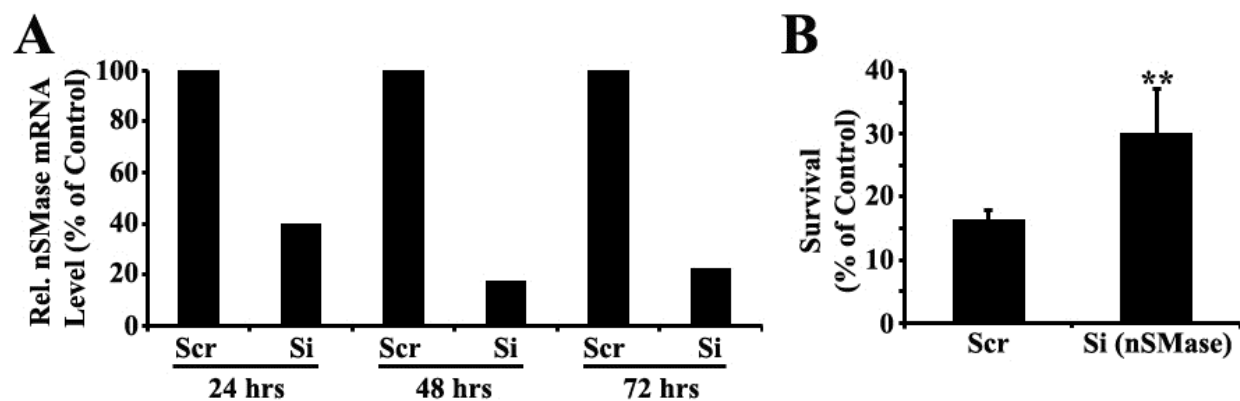

**Figure S4. Effect of nSMase knockdown on survival.** MCF7 cells were transiently transfected with siRNAs against nSMase (Si) or scrambled control siRNAs (Scr) followed by isolation of RNAs at different times for real time RT-PCR analysis of nSMase expression (A) or by treatment with 1  $\mu$ M doxorubicin for 48 hrs and SRB assay for survival (B) as described in Materials and Methods. (\*\* $p < 0.01$ )
